# Supplementary material
Source: PubMed Central journal article supplement (PMC6646286)
Supplement: ao8b01584_si_001.pdf [file ao8b01584_si_001.pdf]

**Supporting Information**

**Exploring the inhibitory and antioxidant effects of fullerene and fullerenol  
on Ribonuclease A**

Pritam Roy<sup>†</sup>, Sudipta Bag<sup>†</sup>, Debanjana Chakraborty<sup>†</sup>, and Swagata Dasgupta\*

<sup>†</sup>Department of Chemistry, Indian Institute of Technology Kharagpur, Kharagpur-721302, India

\*Corresponding Author:

Professor Swagata Dasgupta  
Department of Chemistry  
Indian Institute of Technology Kharagpur,  
Kharagpur-721302. India  
Tel.: +91-3222-283306  
Fax: +91-3222-282252  
Email: swagata@chem.iitkgp.ac.in

### S1. UV-Vis spectra of fullerene and fullerenol

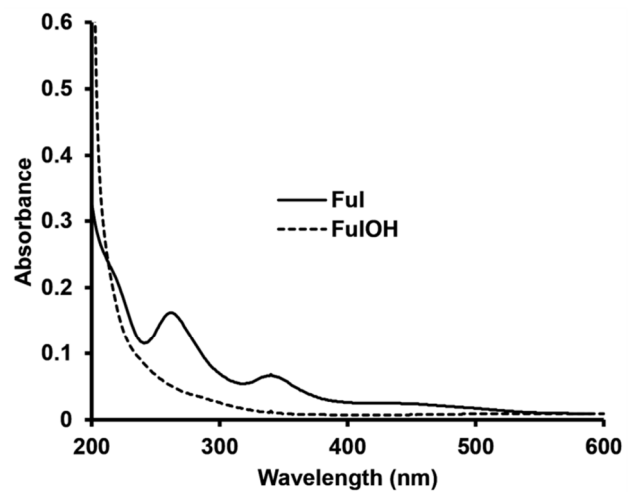

**Figure S1.** UV- vis spectra of Fullerene (Ful) and Fullerenol (FulOH)

## S2. MALDI-TOF

The MALDI-TOF spectrum of fullerene in water

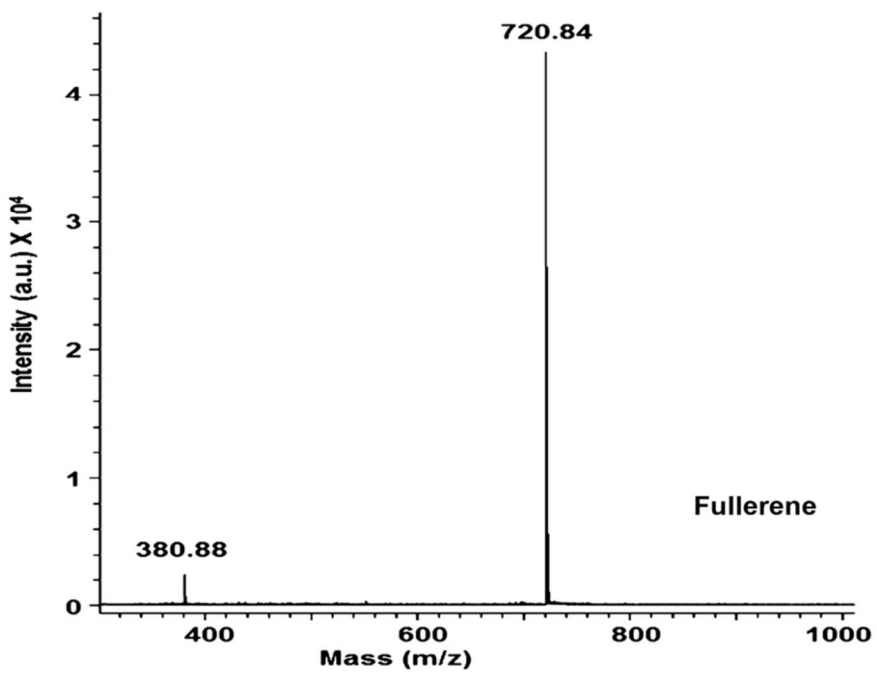

**Figure S2** . MALDI TOF spectrum of fullerene in water

**S3. Microscopic studies of Fullerene and Fullereneol using Field Emission Scanning Electron Microscopy (FESEM) and Atomic Force Microscopy (AFM):**

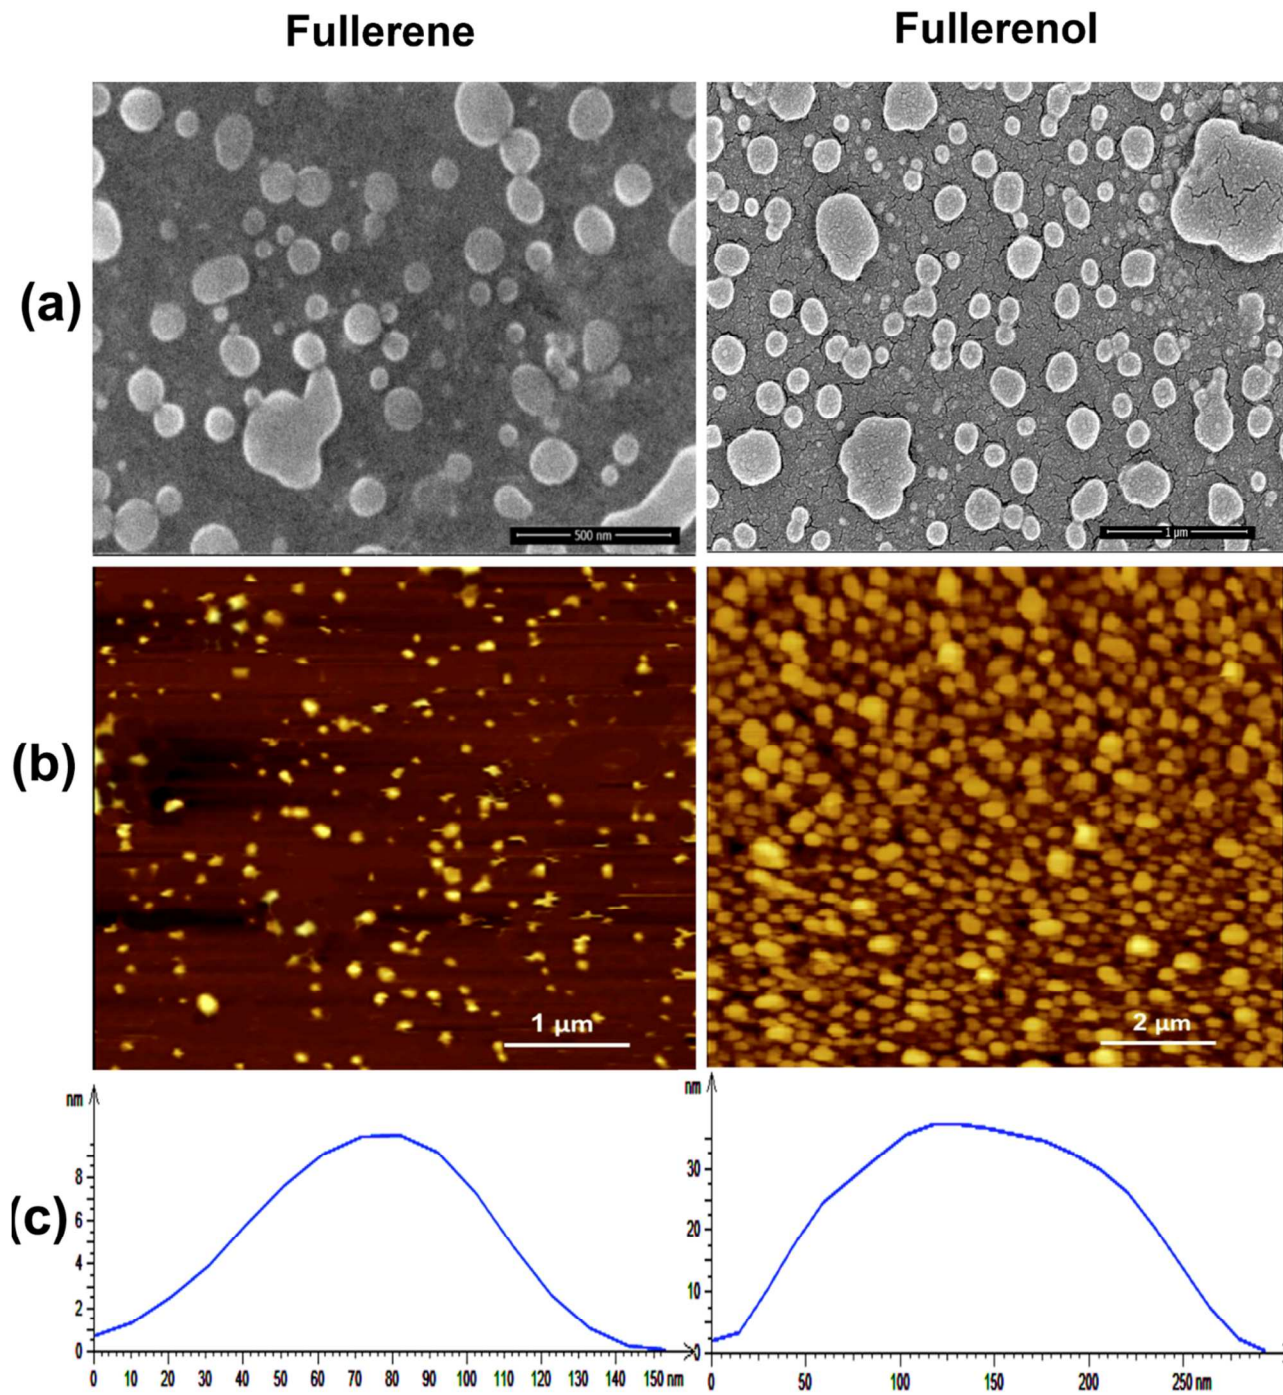

**Figure S3.** (a) FESEM (b) AFM images (c) particle size of fullerene and fullereneol  
Magnification for FESEM images: 114870 X (Fullerene), 50000 X (Fullereneol)

#### S4: DLS studies of fullerene and fullerol in presence of RNase A

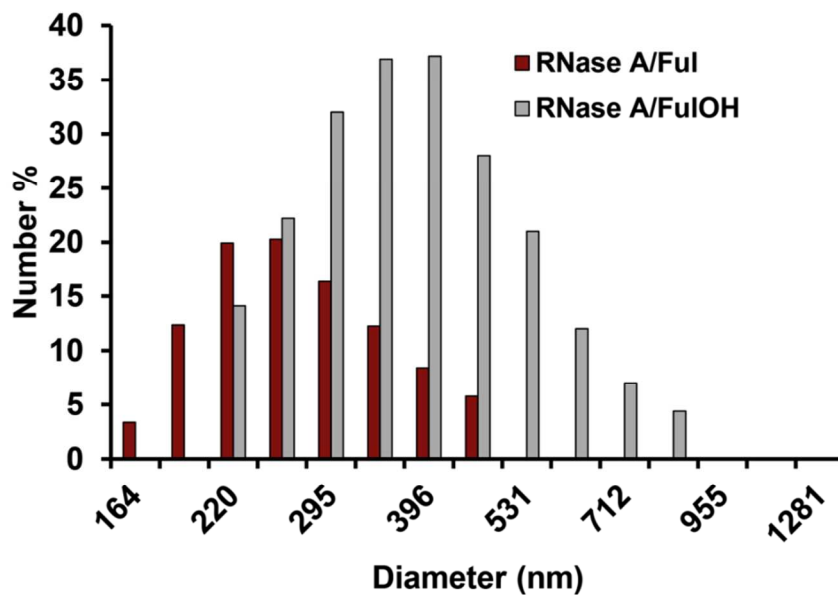

**Figure S4.** DLS measurements of fullerene (RNase A/Ful) and fullerol (RNase A/FulOH) in presence of RNase A

Sizes of RNase A/Ful and RNase A/FulOH are  $275.15 \pm 28.5$  nm and  $369.05 \pm 38.2$  nm respectively.

### S5. Enzyme Activity of DT cross-linked RNase A dimer and monomer

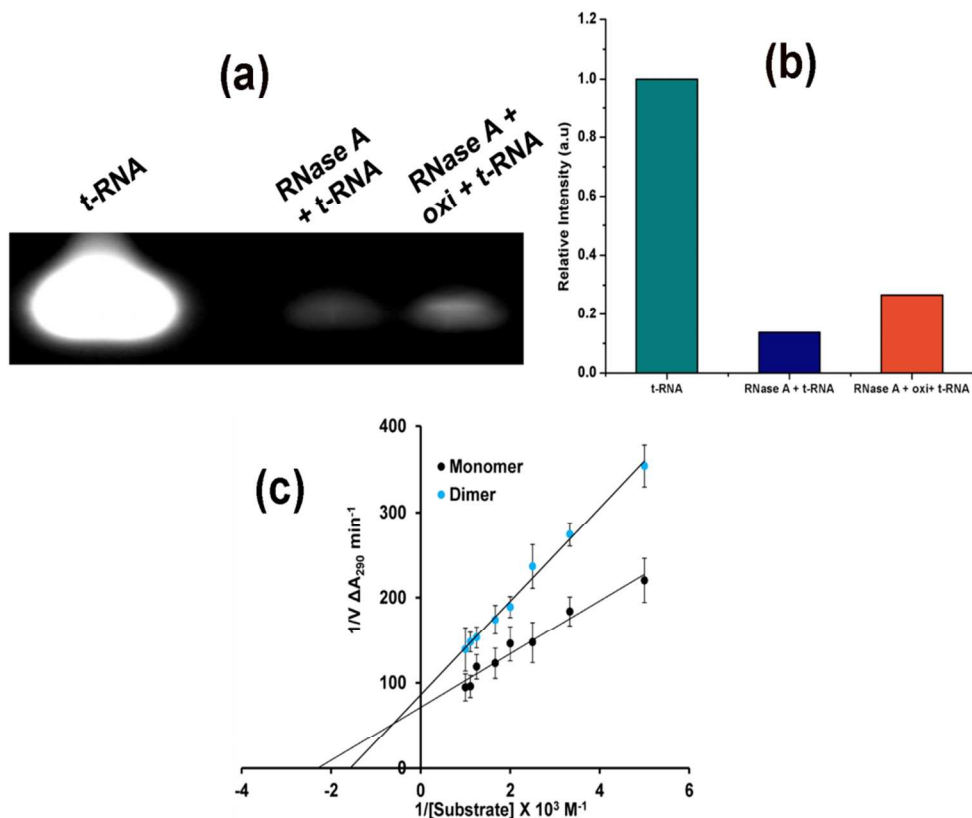

**Figure S5.** (a) Agarose gel of monomer (RNase A) and dimer (RNase A + oxi, oxi=  $K_2S_2O_8 + Co^{2+}$ ) (b) Relative intensities of the agarose gel (c) Lineweaver-Burk plot for monomer and dimer

Table S1 The  $V_{max}$ ,  $K_M$  and  $k_{cat}$  vales for RNase A monomer and DT crosslinked dimer calculated from Lineweaver–Burk plot.

|                                  | <b>Monomer</b>          | <b>Dimer</b>            |
|----------------------------------|-------------------------|-------------------------|
| $V_{max}$ (M min <sup>-1</sup> ) | $13.83 \times 10^{-6}$  | $11.61 \times 10^{-6}$  |
| $K_m$ (M)                        | $434.87 \times 10^{-6}$ | $635.65 \times 10^{-6}$ |
| $K_{cat}$                        | 6.915                   | 5.805                   |
